# Supplementary material
Source: Springer Nature journal article supplement (https://www.springermedizin.de/resource/supplementary/13033_2012_135_MOESM3_ESM.pdf/9651916)

### Total

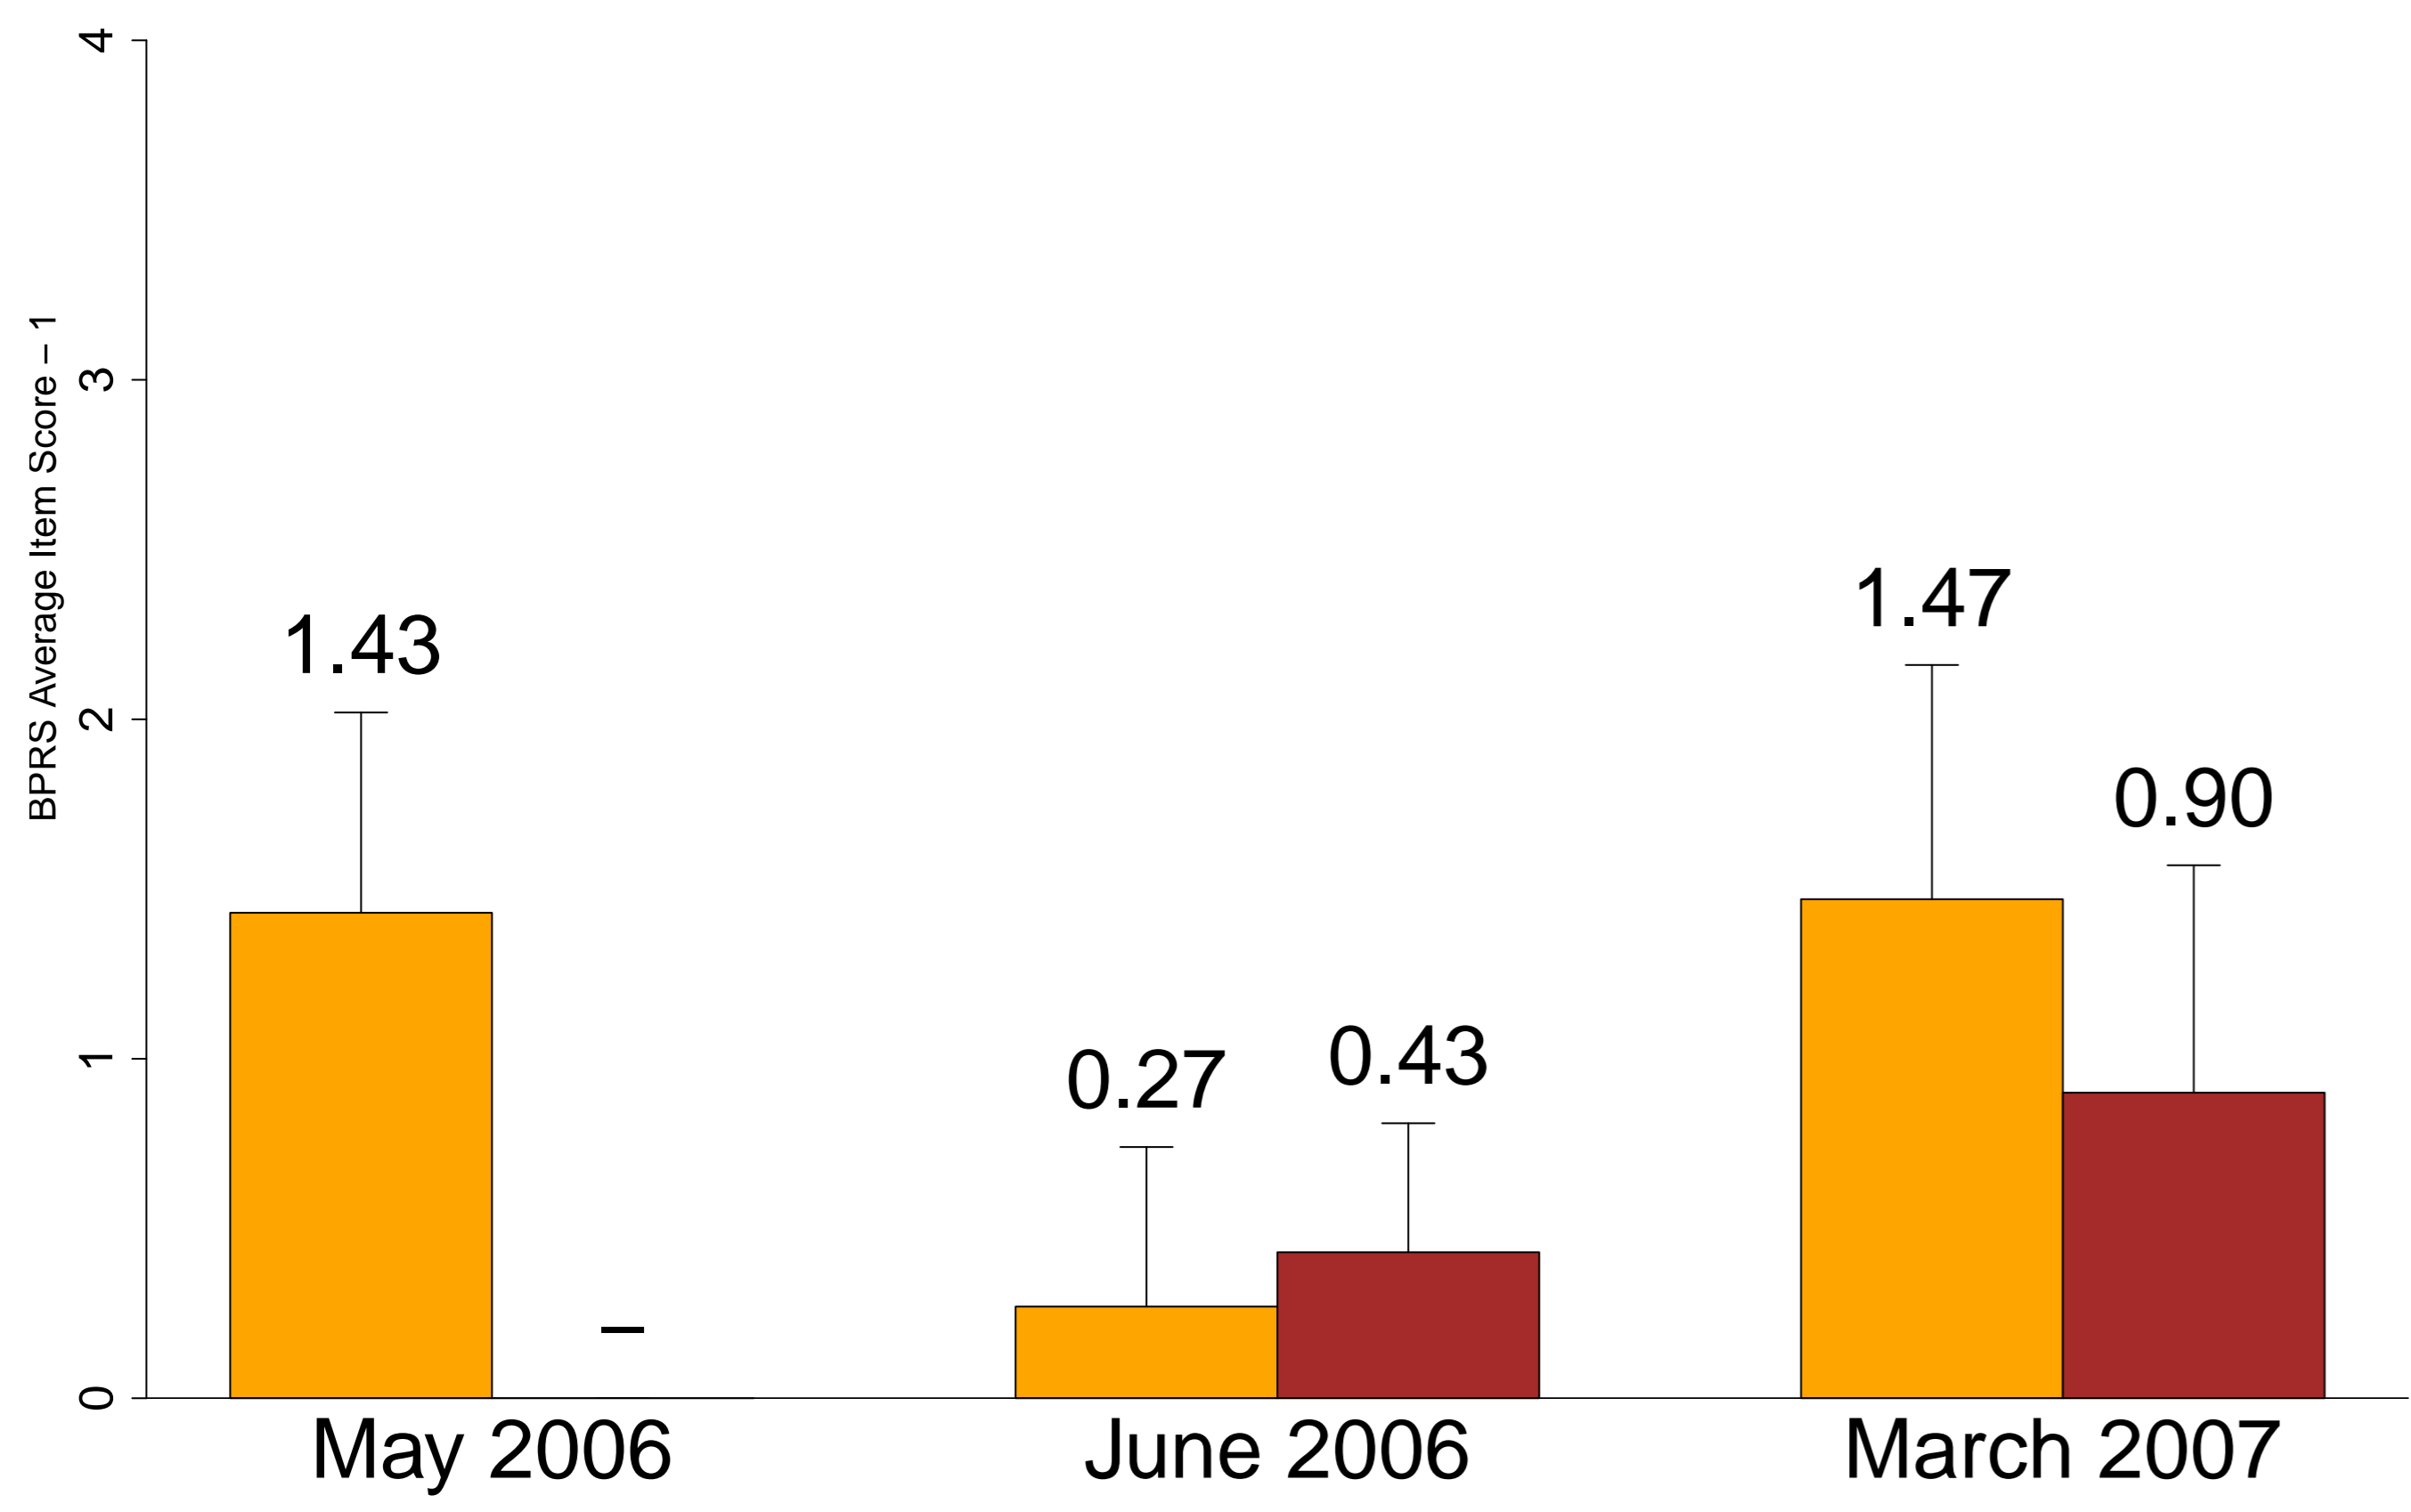

### Positive

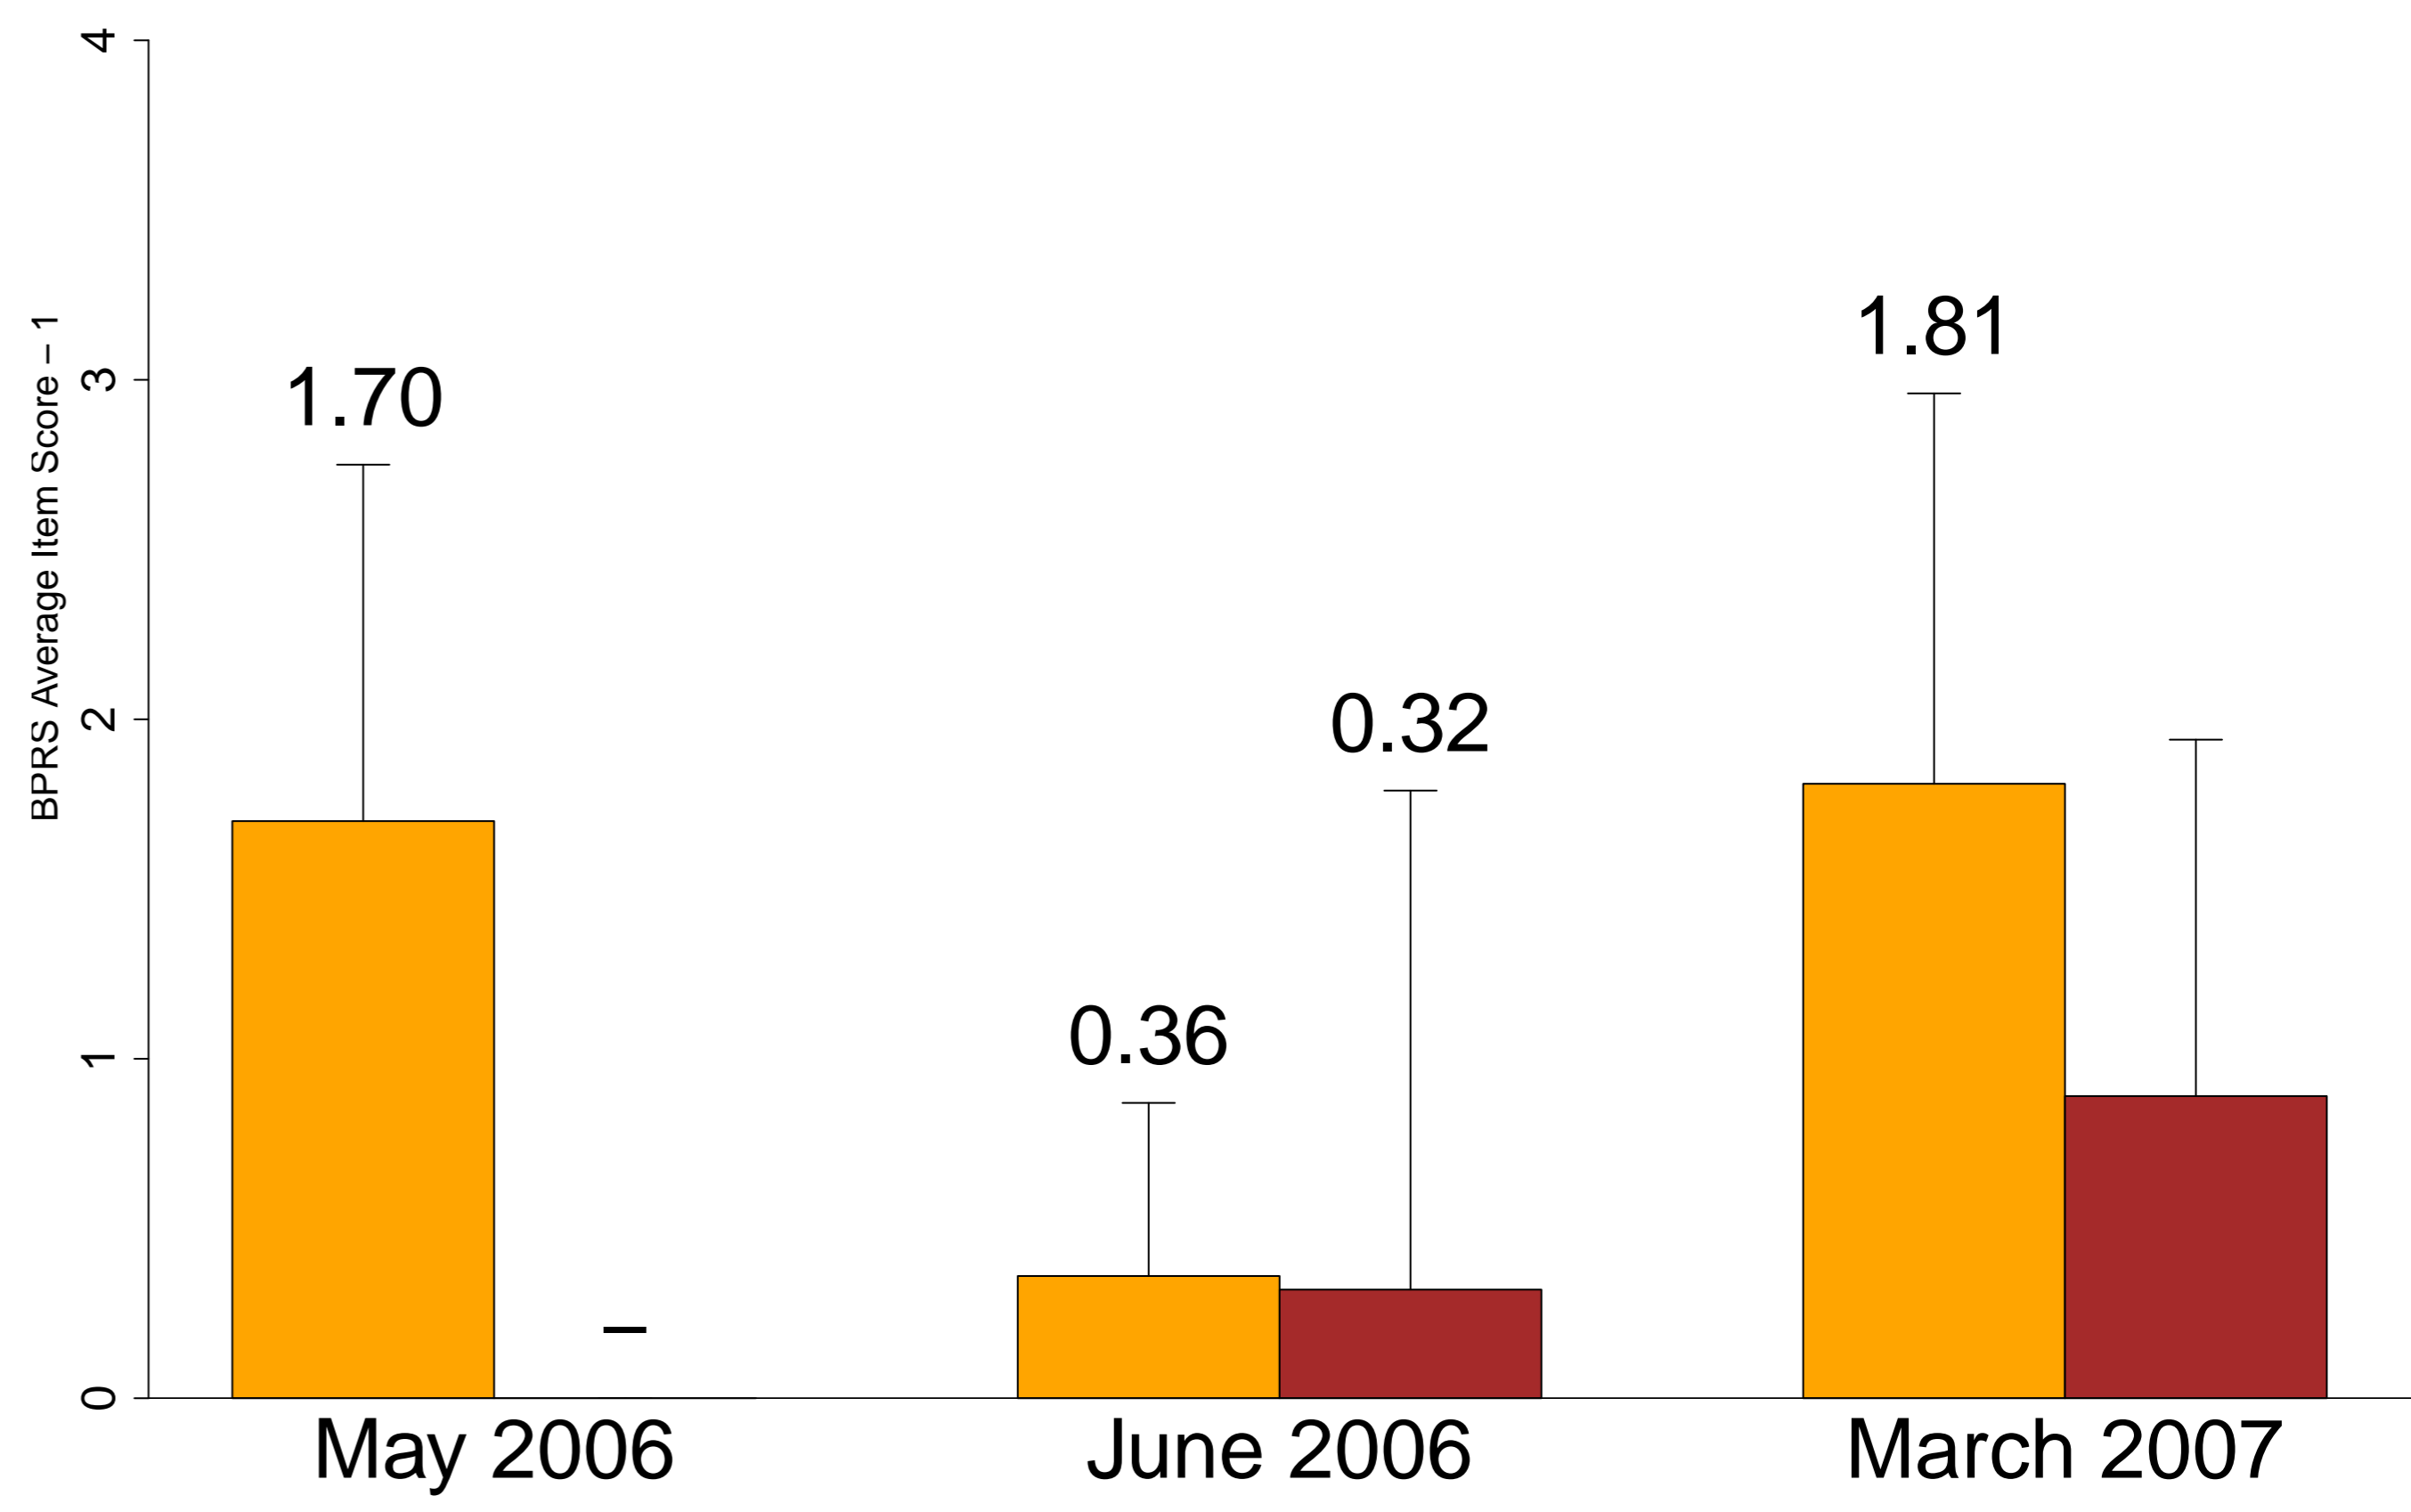

### Negative

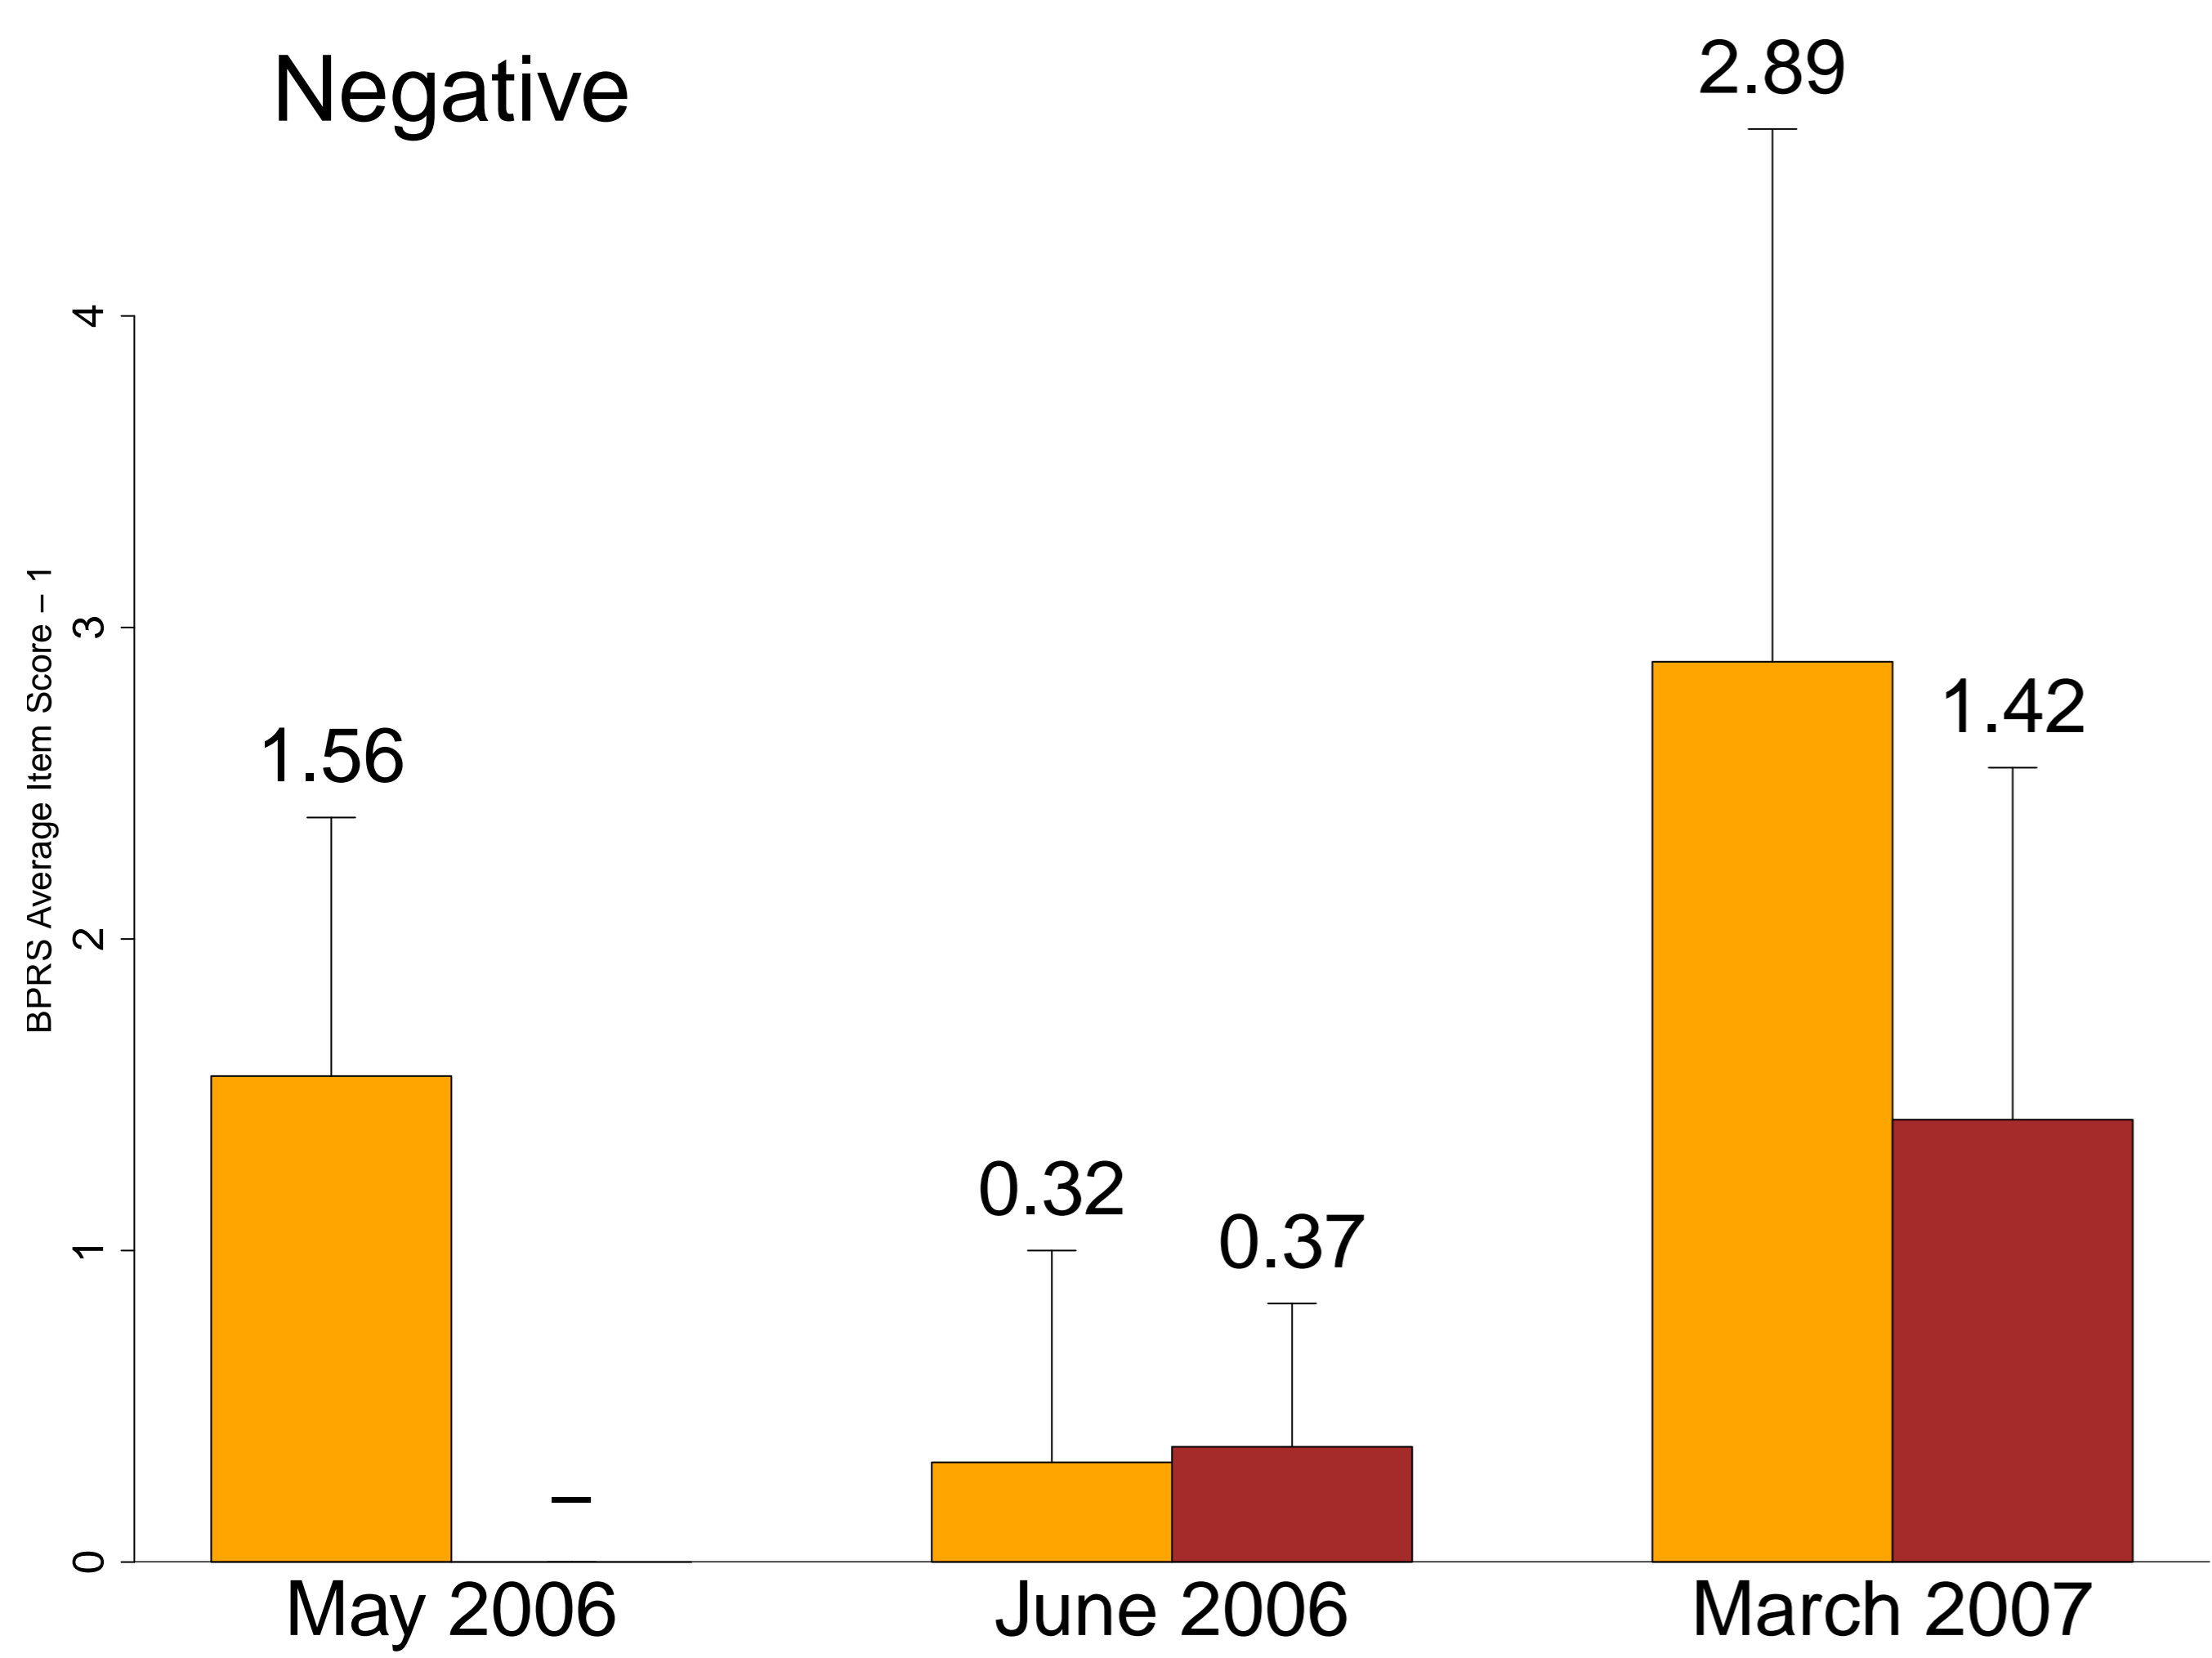

### Depression

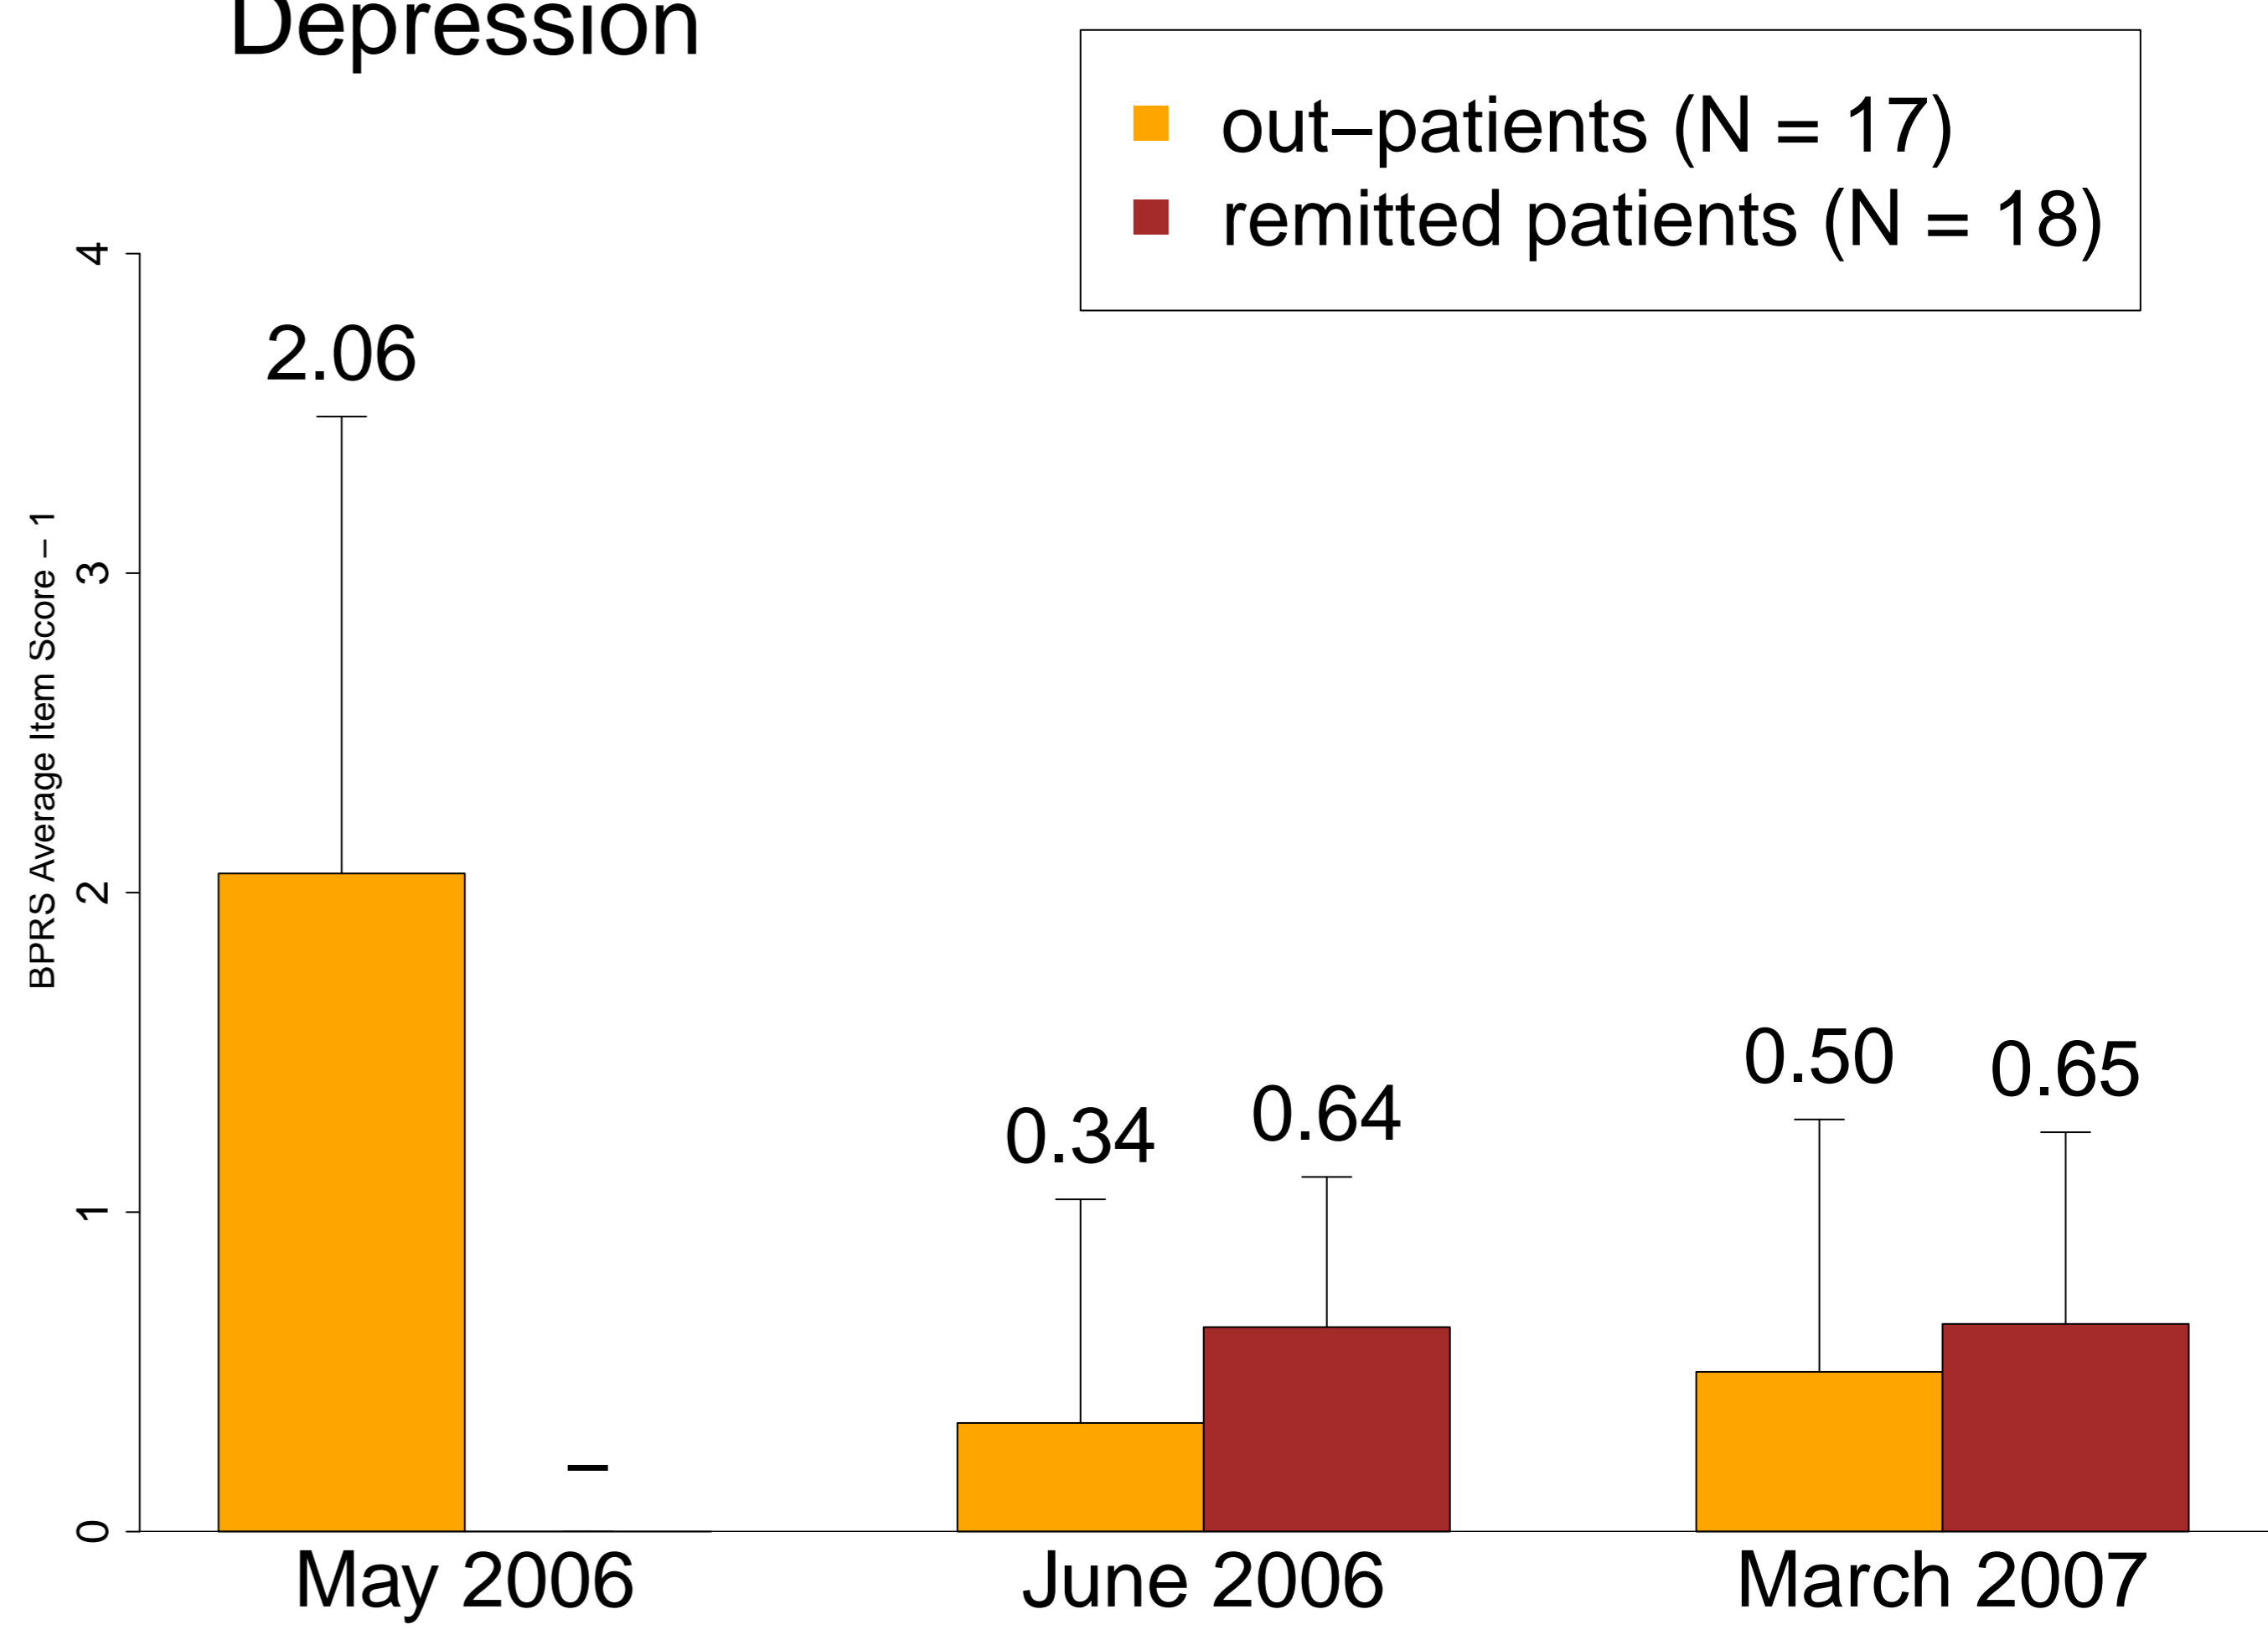

■ out-patients (N = 17)  
■ remitted patients (N = 18)

Supplement: MOESM3 [file 9651916]
